# Supplementary material for: Development of Clinical Radiomics-Based Models to Predict Survival Outcome in Pancreatic Ductal Adenocarcinoma: A Multicenter Retrospective Study
Source: MDPI journal article supplement (doi:10.3390/diagnostics14070712), 2024-03-28
Supplement: s1 [file s1]

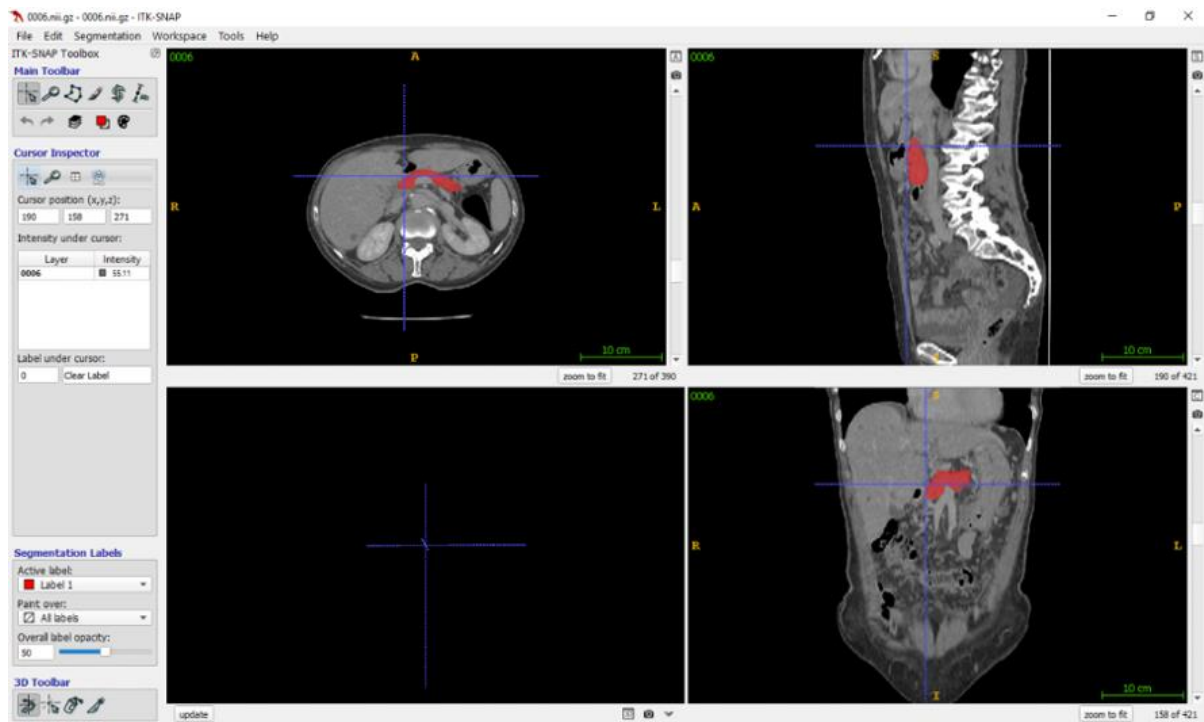

Figure S1: Example of automated segmentation for RPV using ITK-SNAP.

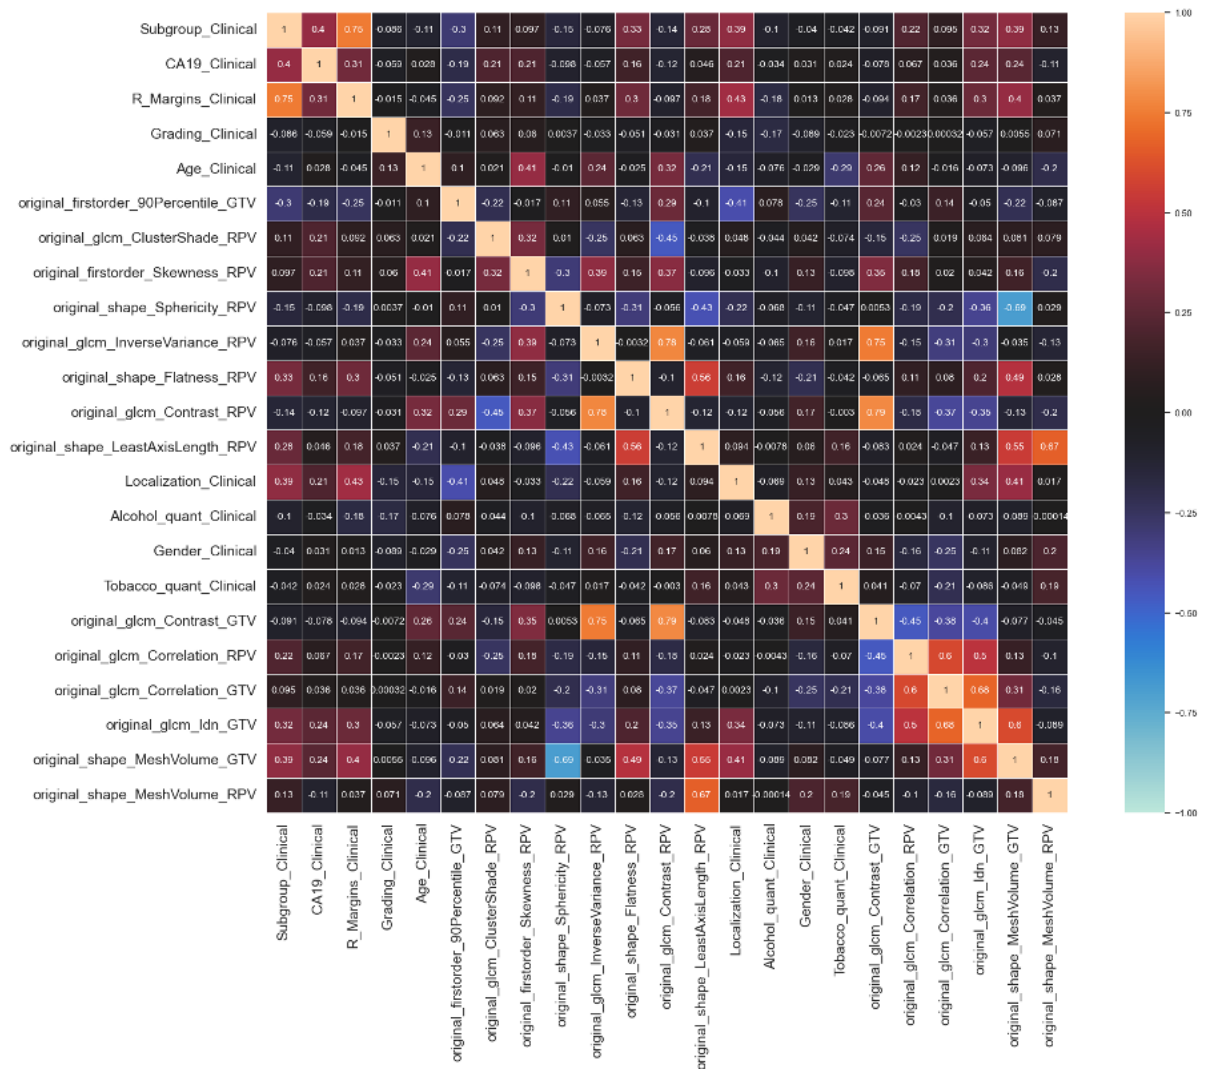

Figure S2: The intercorrelation between the chosen features in the testing dataset (missing clinical features were filled using the MissForest package; the values were not standardised).

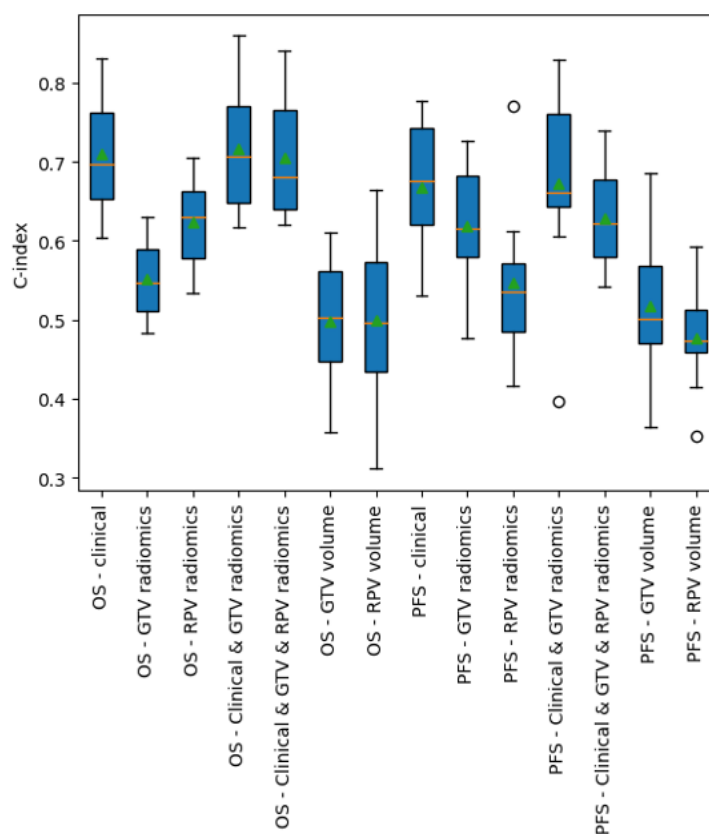

Figure S3: Boxplot showing the comparison of different models (training-validation dataset 10-fold Cross Validation). The blue central boxes represent the interquartile range, with the median indicated by horizontal orange lines inside. Whiskers extend to the maximum non-outlier data points, circles denote outliers, and green triangles indicate the mean.

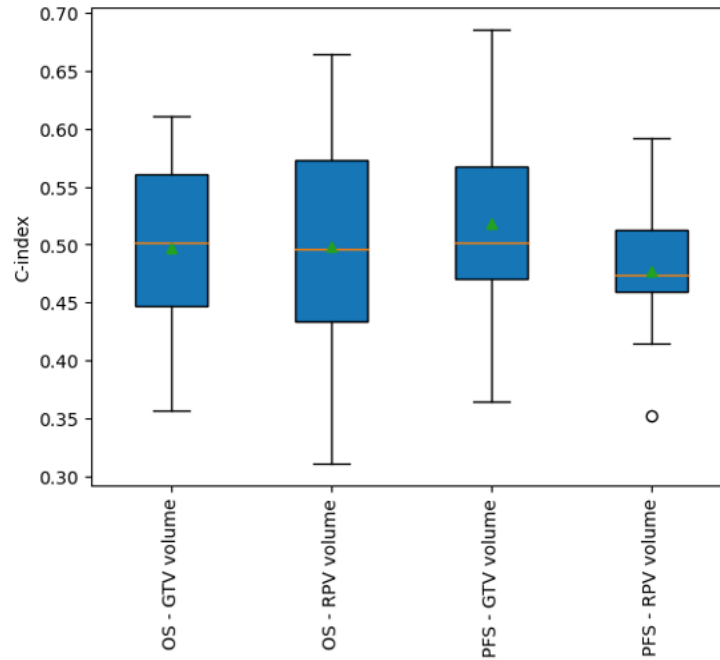

Figure S4: Box plot showing the results of the volume models (training-validation dataset 10-fold Cross Validation). The blue central boxes represent the interquartile range, with the median indicated by horizontal orange lines inside. Whiskers extend to the maximum non-outlier data points, circles denote outliers, and green triangles indicate the mean.

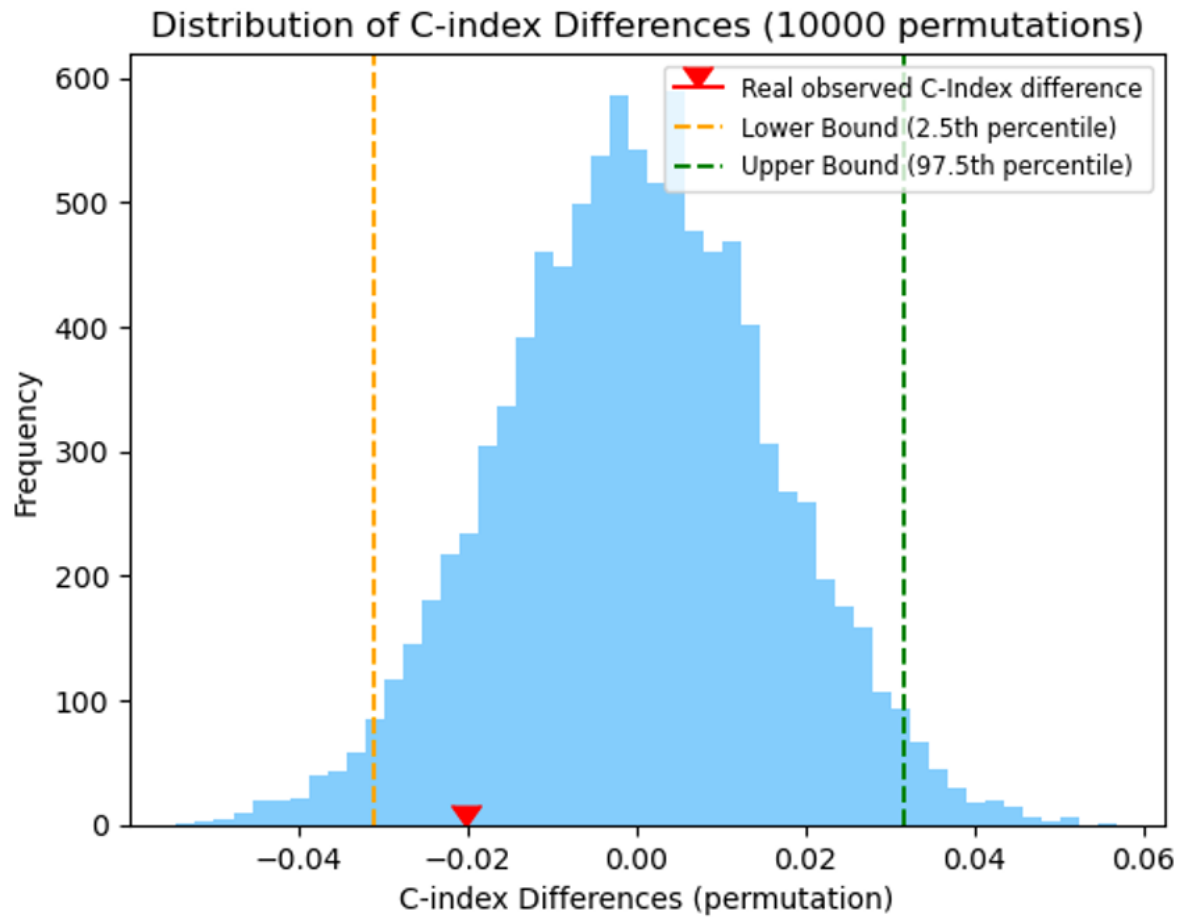

Figure S5: Histogram of two-sided permutation test for comparison between Clinical model and Clinical&GTV1 model for OS prediction. The result highlights that there is no statistically significant difference (Real observed difference between C-indexes: -0.02; p-value: 0.212).

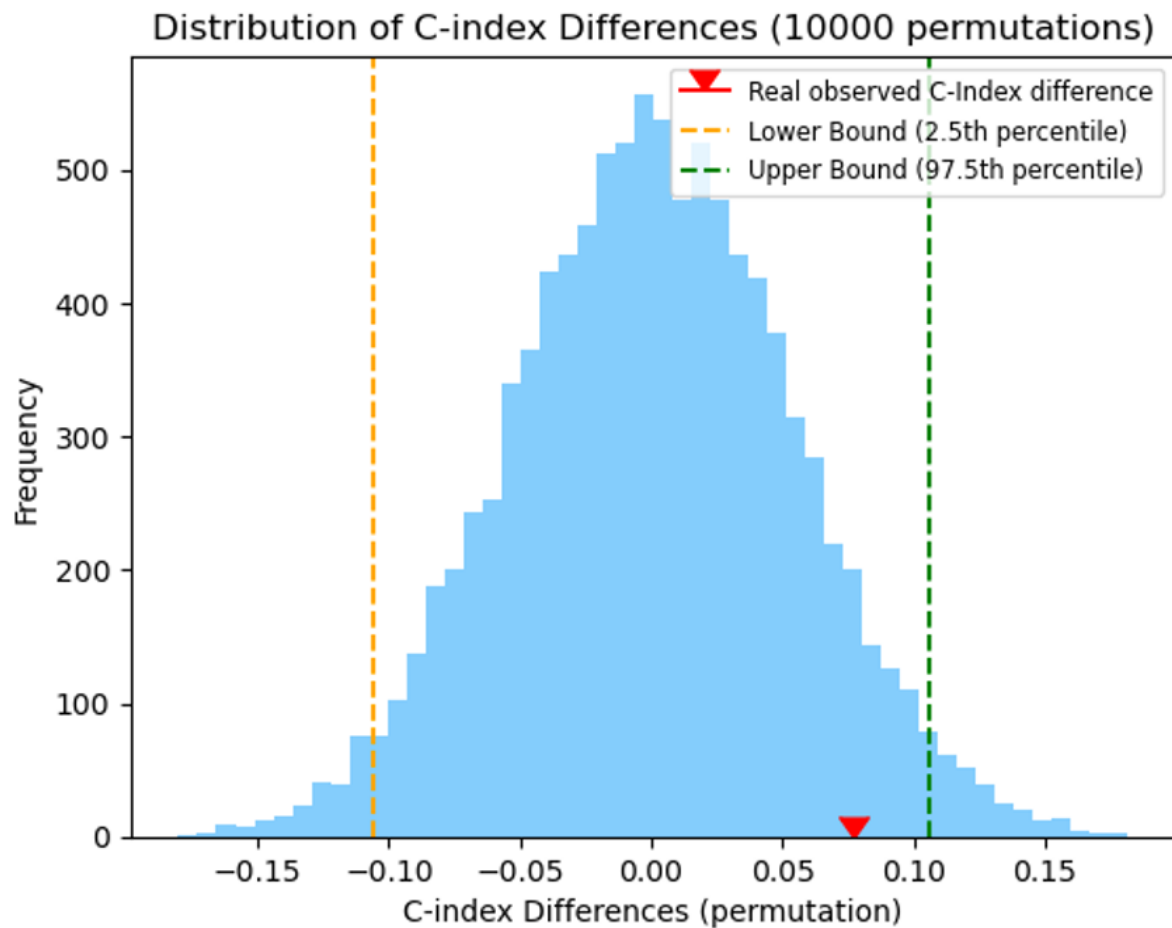

Figure S6: Histogram of two-sided permutation test for comparison between Clinical model and GTV1 radiomics model for OS prediction. The result highlights that there is no statistically significant difference (Real observed difference between C-indexes: -0.077; p-value: 0.156).

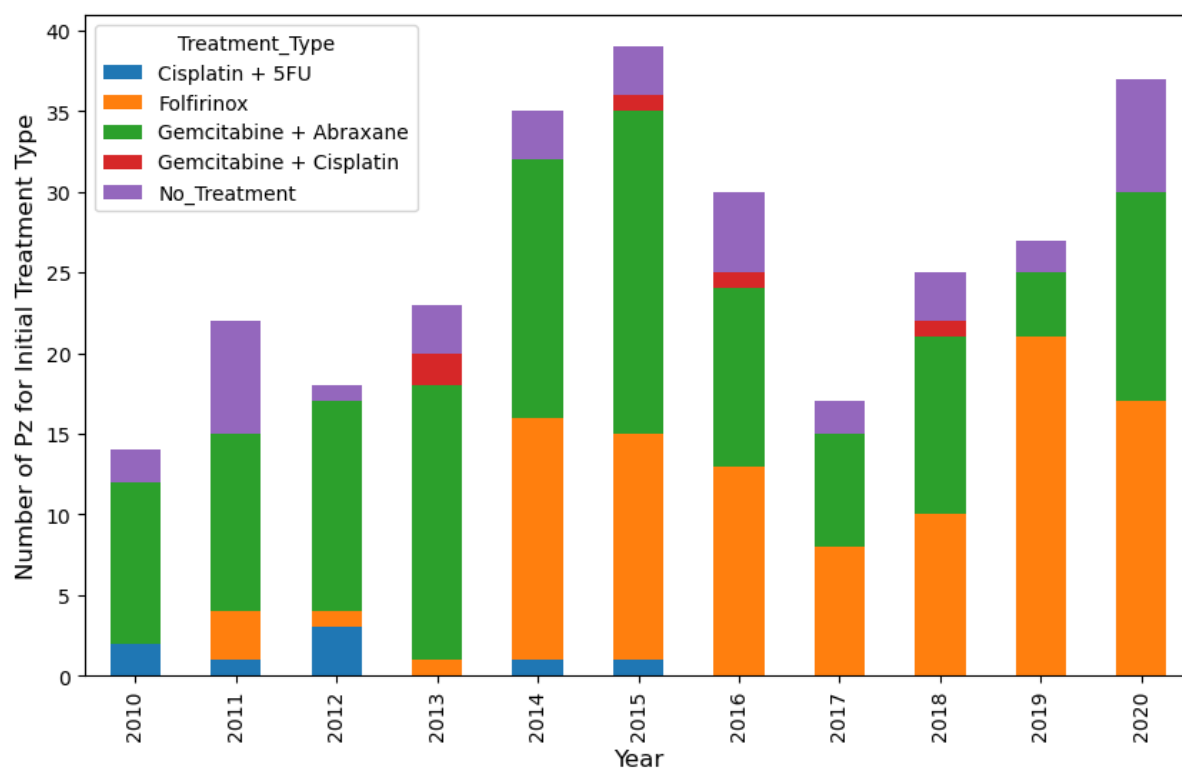

Figure S7: The treatment type, categorised by year and patient count.

## Clinical, radiological and histological data

For each included patient the following clinical features data were collected:

- Demographic: age, gender; BMI, alcohol consumption (according to 5 classes: No consumption, <1 unit/day, 1 – 2/day, >3/day, or stopped consumption) and tobacco consumption (according to 4 classes: No consumption, <20 cigarettes/day or <15 Pack-year (PY), >20 cigarettes/day or >15PY, and old consumer).
- Clinical: tumour markers (Ca19.9 kU/L); treatment type (\*); treatment strategy (\*); Overall Survival (OS) in months (OS was computed from time of histological diagnosis to date of death; the date of death was achieved through the patient's electronic medical record; patients were considered censored if they were lost during follow-up); Progression Free Survival (PFS) in months (PFS was computed from time of treatment initiation to disease progression; patients were considered censored if they were lost during follow-up).
- Radiological: date of pretreatment contrast enhanced CT; location (pancreas head, body or tail); presence of metastatic disease. According to NCCN guidelines (version 2.2022[1,2]), patients were categorised into 4 subgroups (it was added a fourth group for metastatic patients):
  - 1 – Resectable;
  - 2 – Borderline resectable
  - 3 – Locally advanced unresectable
  - 4 – Metastatic
- Histological data: histological grade (well differentiated, moderately/poorly differentiated, or undifferentiated) and resection margins (only for surgically treated patients; if the patient had surgery without resection, it has been reported as “open-closed”).

(\*) Treatment type and treatment strategy were not included as a clinical feature in the models. The treatment type, categorised by year and patient count, referring to the initial frontline chemotherapy treatment, is presented in Supplementary Materials Figure S7.

## Ordinal encoding for clinical data

Gender: “Men” encoded as 1; “Women” encoded as 0.

Tobacco history: “No smoking” encoded as 0; “Stopped” encoded as 1; “<20 cigarette/day or <15 PY” encoded as 2; “>20 cigarette/day or >15 PY” encoded as 3.

Alcohol consumption: “No consumption” encoded as 0; “Old consumption” encoded as 1; “<1 unit/day” encoded as 2; “1-2 unit/day” encoded as 3; “>3 unit/day” encoded as 4.

Localisation of the lesions: “Head” encoded as 0; “Body” encoded as 1; “Tail” encoded as 2.



Subgroup: “Resectable” encoded as 0; “Borderline Resectable” encoded as 1; “Unresectable” encoded as 2; “Metastatic” encoded as 3.

R\_margins: “Resection margin R0” encoded as 0, “Resection margin R1-R2” encoded as 1; “Open-closed without resection” encoded as 2; “No surgery” encoded as 3.

Histological grade: “Well differentiated” encoded as 0; “Moderately differentiated” encoded as 1; “Poorly differentiated” encoded as 2.

### Patient Exclusion Criteria

The following table S1 presents additional details for the 20 patients who were not selected due to technical issues.

| Number of patients | Technical problem              |
|--------------------|--------------------------------|
| 7                  | Data corruption                |
| 13                 | Irregular isotropic resolution |

Table S1: Details regarding technical problems for 20 cases.

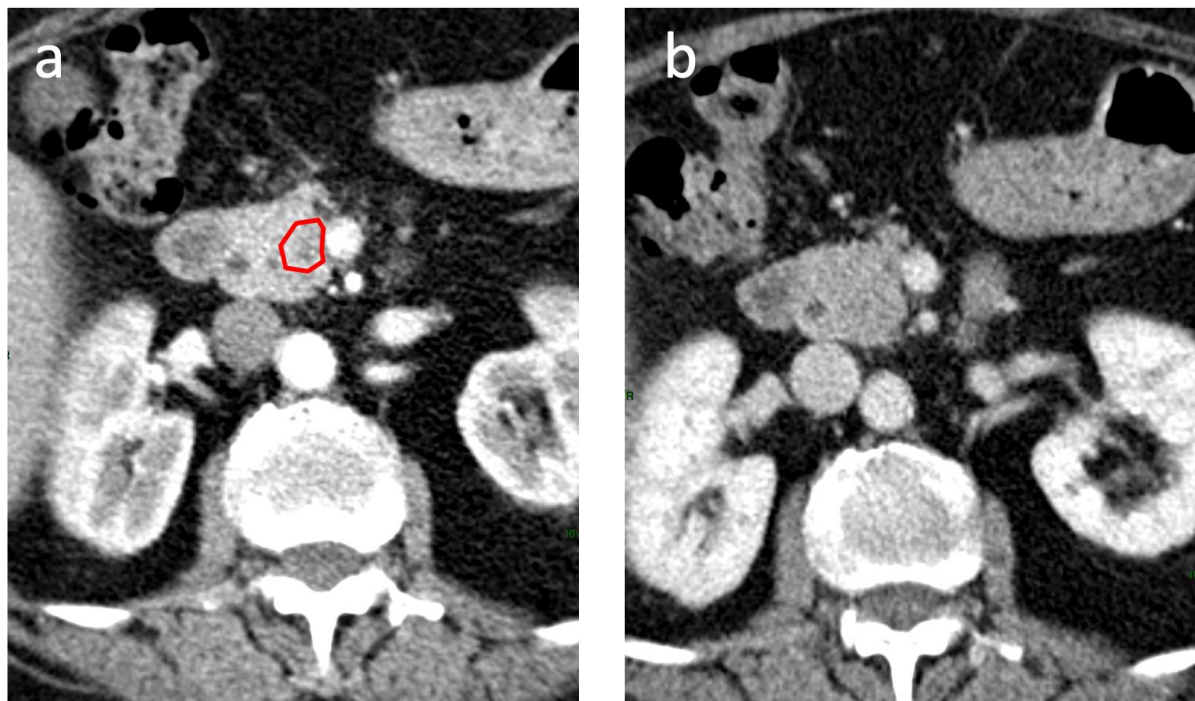

Figure S8: Image (a) displays a localised PDAC in the head of the pancreas (identified by segmentation with a red-coloured outline), visible in the arterial phase. Image (b) depicts the same slice in the portal phase; the lesion localised in the head of the pancreas is not clearly visible.

## GradientBoostingSurvivalAnalysis classifier setting

GradientBoostingSurvivalAnalysis(n\_estimators = 100, learning\_rate = 0.001, max\_depth = 4, min\_samples\_split = 10, min\_samples\_leaf = 2, max\_features = 1, random\_state = 0)

## Assessment of feature repeatability

To evaluate the consistency of features for GTV1, as well as the reliability between the same rater (intra-rater) and different observers (inter-observer), GTV segmentations were independently performed a second time (GTV2) by the same radiologist, and a third time (GTV3) by a first-year radiologist resident on a subset of 45 randomly selected patients. The assessment of intra-rater and inter-observer reliability was conducted using the IntraClass Correlation Coefficient (ICC2) with a two-way mixed effects model for single measurements. Only features with an ICC2 value greater than 0.75 were considered for further analysis. Table S2 displays the ICC2 value for each individual radiomics feature.

| Feature                                   | ICC2     |
|-------------------------------------------|----------|
| original_shape_Elongation                 | 0.459575 |
| original_shape_Flatness                   | 0.458395 |
| original_shape_LeastAxisLength            | 0.889306 |
| original_shape_MajorAxisLength            | 0.795244 |
| original_shape_Maximum2DDiameterColumn    | 0.784582 |
| original_shape_Maximum2DDiameterRow       | 0.836128 |
| original_shape_Maximum2DDiameterSlice     | 0.859434 |
| original_shape_Maximum3DDiameter          | 0.803635 |
| original_shape_MeshVolume                 | 0.924731 |
| original_shape_MinorAxisLength            | 0.846515 |
| original_shape_Sphericity                 | 0.118551 |
| original_shape_SurfaceArea                | 0.890514 |
| original_shape_SurfaceVolumeRatio         | 0.785983 |
| original_shape_VoxelVolume                | 0.92473  |
| original_firstorder_10Percentile          | 0.920356 |
| original_firstorder_90Percentile          | 0.832288 |
| original_firstorder_Energy                | 0.481856 |
| original_firstorder_Entropy               | 0.862737 |
| original_firstorder_InterquartileRange    | 0.846646 |
| original_firstorder_Kurtosis              | 0.530602 |
| original_firstorder_Maximum               | 0.50055  |
| original_firstorder_MeanAbsoluteDeviation | 0.765523 |
| original_firstorder_Mean                  | 0.880542 |
| original_firstorder_Median                | 0.88733  |
| original_firstorder_Minimum               | 0.424958 |
| original_firstorder_Range                 | 0.51967  |

|                                                    |          |
|----------------------------------------------------|----------|
| original_firstorder_RobustMeanAbsoluteDeviation    | 0.849992 |
| original_firstorder_RootMeanSquared                | 0.810483 |
| original_firstorder_Skewness                       | 0.472317 |
| original_firstorder_TotalEnergy                    | 0.481856 |
| original_firstorder_Uniformity                     | 0.855454 |
| original_firstorder_Variance                       | 0.202819 |
| original_glcm_Autocorrelation                      | 0.138281 |
| original_glcm_ClusterProminence                    | 0.016634 |
| original_glcm_ClusterShade                         | 0.03345  |
| original_glcm_ClusterTendency                      | 0.135008 |
| original_glcm_Contrast                             | 0.812275 |
| original_glcm_Correlation                          | 0.850655 |
| original_glcm_DifferenceAverage                    | 0.983567 |
| original_glcm_DifferenceEntropy                    | 0.982712 |
| original_glcm_DifferenceVariance                   | 0.489319 |
| original_glcm_Id                                   | 0.994525 |
| original_glcm_Idm                                  | 0.994789 |
| original_glcm_Idmn                                 | 0.686105 |
| original_glcm_Idn                                  | 0.799461 |
| original_glcm_Imc1                                 | 0.914516 |
| original_glcm_Imc2                                 | 0.859136 |
| original_glcm_InverseVariance                      | 0.983797 |
| original_glcm_JointAverage                         | 0.335886 |
| original_glcm_JointEnergy                          | 0.911571 |
| original_glcm_JointEntropy                         | 0.941204 |
| original_glcm_MCC                                  | 0.818961 |
| original_glcm_MaximumProbability                   | 0.898468 |
| original_glcm_SumAverage                           | 0.335886 |
| original_glcm_SumEntropy                           | 0.812685 |
| original_glcm_SumSquares                           | 0.173292 |
| original_gldm_DependenceEntropy                    | 0.644118 |
| original_gldm_DependenceNonUniformity              | 0.91154  |
| original_gldm_DependenceNonUniformityNormalized    | 0.993398 |
| original_gldm_DependenceVariance                   | 0.982072 |
| original_gldm_GrayLevelNonUniformity               | 0.952885 |
| original_gldm_GrayLevelVariance                    | 0.203357 |
| original_gldm_HighGrayLevelEmphasis                | 0.143272 |
| original_gldm_LargeDependenceEmphasis              | 0.994506 |
| original_gldm_LargeDependenceHighGrayLevelEmphasis | 0.294853 |
| original_gldm_LargeDependenceLowGrayLevelEmphasis  | 0.724299 |
| original_gldm_LowGrayLevelEmphasis                 | 0.672107 |
| original_gldm_SmallDependenceEmphasis              | 0.987764 |
| original_gldm_SmallDependenceHighGrayLevelEmphasis | 0.296193 |
| original_gldm_SmallDependenceLowGrayLevelEmphasis  | 0.529537 |
| original_glrlm_GrayLevelNonUniformity              | 0.940368 |
| original_glrlm_GrayLevelNonUniformityNormalized    | 0.856519 |
| original_glrlm_GrayLevelVariance                   | 0.145011 |
| original_glrlm_HighGrayLevelRunEmphasis            | 0.143642 |
| original_glrlm_LongRunEmphasis                     | 0.991854 |
| original_glrlm_LongRunHighGrayLevelEmphasis        | 0.321922 |
| original_glrlm_LongRunLowGrayLevelEmphasis         | 0.654944 |

|                                                 |          |
|-------------------------------------------------|----------|
| original_glrIm_LowGrayLevelRunEmphasis          | 0.662079 |
| original_glrIm_RunEntropy                       | 0.803156 |
| original_glrIm_RunLengthNonUniformity           | 0.876233 |
| original_glrIm_RunLengthNonUniformityNormalized | 0.994128 |
| original_glrIm_RunPercentage                    | 0.994718 |
| original_glrIm_RunVariance                      | 0.992352 |
| original_glrIm_ShortRunEmphasis                 | 0.991254 |
| original_glrIm_ShortRunHighGrayLevelEmphasis    | 0.178362 |
| original_glrIm_ShortRunLowGrayLevelEmphasis     | 0.631633 |
| original_glszm_GrayLevelNonUniformity           | 0.889301 |
| original_glszm_GrayLevelNonUniformityNormalized | 0.661467 |
| original_glszm_GrayLevelVariance                | 0.263403 |
| original_glszm_HighGrayLevelZoneEmphasis        | 0.163298 |
| original_glszm_LargeAreaEmphasis                | 0.961113 |
| original_glszm_LargeAreaHighGrayLevelEmphasis   | 0.609591 |
| original_glszm_LargeAreaLowGrayLevelEmphasis    | 0.857048 |
| original_glszm_LowGrayLevelZoneEmphasis         | 0.561977 |
| original_glszm_SizeZoneNonUniformity            | 0.879926 |
| original_glszm_SizeZoneNonUniformityNormalized  | 0.969058 |
| original_glszm_SmallAreaEmphasis                | 0.963481 |
| original_glszm_SmallAreaHighGrayLevelEmphasis   | 0.216827 |
| original_glszm_SmallAreaLowGrayLevelEmphasis    | 0.371869 |
| original_glszm_ZoneEntropy                      | 0.753702 |
| original_glszm_ZonePercentage                   | 0.974109 |
| original_glszm_ZoneVariance                     | 0.961093 |
| original_ngtdm_Busyness                         | 0.871962 |
| original_ngtdm_Coarseness                       | 0.876649 |
| original_ngtdm_Complexity                       | 0.271338 |
| original_ngtdm_Contrast                         | 0.825409 |
| original_ngtdm_Strength                         | 0.262095 |

Table S2: ICC2 values for radiomics features.

## Independent features

To reduce redundancy and eliminate highly correlated features, we applied a Spearman correlation coefficient threshold of 0.80. The resulting table S3 presents the sets of not correlated features that were deemed reliable and informative both for OS and PFS:

| Clinical features                                                                                                  | GTV1                                                                                                                                                                                                                                                                                   | RPV                                                                                                                                                                                                                                                                                                                                                                                                                                                                                                                                                                                                                                                                                                                                                                                                                                                                                                                                                                                                                                                                                                         | clinical&GTV1                                                                                                                                                                                                                                                                                                                                                                                                                                                                                                                                                                                                                                                                                                                                                                                                                                                                                                                                                                                                                                                                                                                                                                                                                                                                                                                                                                                                                                                                                | clinical&GTV1&RPV                                                                                                                                                                                                                                                                                                                                                                                                                                                                                                                                                                                                                                                                                                                                                                                                                                                                                                                                                                                                                                                                                                                                                                                                                                                                                                                                                                                                                                                                            |
|--------------------------------------------------------------------------------------------------------------------|----------------------------------------------------------------------------------------------------------------------------------------------------------------------------------------------------------------------------------------------------------------------------------------|-------------------------------------------------------------------------------------------------------------------------------------------------------------------------------------------------------------------------------------------------------------------------------------------------------------------------------------------------------------------------------------------------------------------------------------------------------------------------------------------------------------------------------------------------------------------------------------------------------------------------------------------------------------------------------------------------------------------------------------------------------------------------------------------------------------------------------------------------------------------------------------------------------------------------------------------------------------------------------------------------------------------------------------------------------------------------------------------------------------|----------------------------------------------------------------------------------------------------------------------------------------------------------------------------------------------------------------------------------------------------------------------------------------------------------------------------------------------------------------------------------------------------------------------------------------------------------------------------------------------------------------------------------------------------------------------------------------------------------------------------------------------------------------------------------------------------------------------------------------------------------------------------------------------------------------------------------------------------------------------------------------------------------------------------------------------------------------------------------------------------------------------------------------------------------------------------------------------------------------------------------------------------------------------------------------------------------------------------------------------------------------------------------------------------------------------------------------------------------------------------------------------------------------------------------------------------------------------------------------------|----------------------------------------------------------------------------------------------------------------------------------------------------------------------------------------------------------------------------------------------------------------------------------------------------------------------------------------------------------------------------------------------------------------------------------------------------------------------------------------------------------------------------------------------------------------------------------------------------------------------------------------------------------------------------------------------------------------------------------------------------------------------------------------------------------------------------------------------------------------------------------------------------------------------------------------------------------------------------------------------------------------------------------------------------------------------------------------------------------------------------------------------------------------------------------------------------------------------------------------------------------------------------------------------------------------------------------------------------------------------------------------------------------------------------------------------------------------------------------------------|
| Localization<br>Gender<br>Age<br>BMI<br>Alcohol_quant<br>Tobacco_quant<br>CA19<br>Subgroup<br>Grading<br>R_Margins | original_shape_LeastAxisLength_GTV<br>original_firstorder_10Percentile_GTV<br>original_firstorder_90Percentile_GTV<br>original_firstorder_Entropy_GTV<br>original_glcmm_Contrast_GTV<br>original_glcmm_Correlation_GTV<br>original_glcmm_Idn_GTV<br>original_glcmm_InverseVariance_GTV | original_shape_Elongation_RPV<br>original_shape_Flatness_RPV<br>original_shape_LeastAxisLength_RPV<br>original_shape_MajorAxisLength_RPV<br>original_shape_Maximum2DDiameterColumn_RPV<br>original_shape_Maximum2DDiameterRow_RPV<br>original_shape_Maximum2DDiameterSlice_RPV<br>original_shape_MeshVolume_RPV<br>original_shape_MinorAxisLength_RPV<br>original_shape_Sphericity_RPV<br>original_shape_SurfaceArea_RPV<br>original_shape_SurfaceVolumeRatio_RPV<br>original_firstorder_10Percentile_RPV<br>original_firstorder_90Percentile_RPV<br>original_firstorder_Energy_RPV<br>original_firstorder_Entropy_RPV<br>original_firstorder_Kurtosis_RPV<br>original_firstorder_Maximum_RPV<br>original_firstorder_Minimum_RPV<br>original_firstorder_Range_RPV<br>original_firstorder_Skewness_RPV<br>original_glcmm_ClusterShade_RPV<br>original_glcmm_Contrast_RPV<br>original_glcmm_Correlation_RPV<br>original_glcmm_Idmn_RPV<br>original_glcmm_InverseVariance_RPV<br>original_gldm_LargeDependenceHighGrayLevelEmphasis_RPV<br>original_glszm_LargeAreaEmphasis_RPV<br>original_ngtdm_Busyness_RPV | Localization<br>Gender<br>Age<br>BMI<br>Alcohol_quant<br>Tobacco_quant<br>CA19<br>Subgroup<br>Grading<br>R_Margins<br>original_shape_LeastAxisLength_GTV<br>original_firstorder_10Percentile_GTV<br>original_firstorder_90Percentile_GTV<br>original_firstorder_Entropy_GTV<br>original_glcmm_Contrast_GTV<br>original_glcmm_Correlation_GTV<br>original_glcmm_Idn_GTV<br>original_glcmm_InverseVariance_GTV<br>original_shape_Elongation_RPV<br>original_shape_Flatness_RPV<br>original_shape_LeastAxisLength_RPV<br>original_shape_MajorAxisLength_RPV<br>original_shape_Maximum2DDiameterColumn_RPV<br>original_shape_Maximum2DDiameterRow_RPV<br>original_shape_Maximum2DDiameterSlice_RPV<br>original_shape_MeshVolume_RPV<br>original_shape_MinorAxisLength_RPV<br>original_shape_Sphericity_RPV<br>original_shape_SurfaceArea_RPV<br>original_shape_SurfaceVolumeRatio_RPV<br>original_firstorder_10Percentile_RPV<br>original_firstorder_90Percentile_RPV<br>original_firstorder_Energy_RPV<br>original_firstorder_Entropy_RPV<br>original_firstorder_Kurtosis_RPV<br>original_firstorder_Maximum_RPV<br>original_firstorder_Minimum_RPV<br>original_firstorder_Range_RPV<br>original_firstorder_Skewness_RPV<br>original_glcmm_ClusterShade_RPV<br>original_glcmm_Correlation_RPV<br>original_glcmm_Idmn_RPV<br>original_glcmm_InverseVariance_RPV<br>original_gldm_LargeDependenceHighGrayLevelEmphasis_RPV<br>original_glszm_LargeAreaEmphasis_RPV<br>original_ngtdm_Busyness_RPV | Localization<br>Gender<br>Age<br>BMI<br>Alcohol_quant<br>Tobacco_quant<br>CA19<br>Subgroup<br>Grading<br>R_Margins<br>original_shape_LeastAxisLength_GTV<br>original_firstorder_10Percentile_GTV<br>original_firstorder_90Percentile_GTV<br>original_firstorder_Entropy_GTV<br>original_glcmm_Contrast_GTV<br>original_glcmm_Correlation_GTV<br>original_glcmm_Idn_GTV<br>original_glcmm_InverseVariance_GTV<br>original_shape_Elongation_RPV<br>original_shape_Flatness_RPV<br>original_shape_LeastAxisLength_RPV<br>original_shape_MajorAxisLength_RPV<br>original_shape_Maximum2DDiameterColumn_RPV<br>original_shape_Maximum2DDiameterRow_RPV<br>original_shape_Maximum2DDiameterSlice_RPV<br>original_shape_MeshVolume_RPV<br>original_shape_MinorAxisLength_RPV<br>original_shape_Sphericity_RPV<br>original_shape_SurfaceArea_RPV<br>original_shape_SurfaceVolumeRatio_RPV<br>original_firstorder_10Percentile_RPV<br>original_firstorder_90Percentile_RPV<br>original_firstorder_Energy_RPV<br>original_firstorder_Entropy_RPV<br>original_firstorder_Kurtosis_RPV<br>original_firstorder_Maximum_RPV<br>original_firstorder_Minimum_RPV<br>original_firstorder_Range_RPV<br>original_firstorder_Skewness_RPV<br>original_glcmm_ClusterShade_RPV<br>original_glcmm_Correlation_RPV<br>original_glcmm_Idmn_RPV<br>original_glcmm_InverseVariance_RPV<br>original_gldm_LargeDependenceHighGrayLevelEmphasis_RPV<br>original_glszm_LargeAreaEmphasis_RPV<br>original_ngtdm_Busyness_RPV |

Table S3: List of not correlated features.

## Univariate analysis

The table S4 presents the results of the univariate analysis for each individual clinical and radiomic feature used in the models. It specifically reports the corresponding C-indexes obtained from the GradientBoostingSurvivalAnalysis classifier trained on the training-validation dataset and tested on the testing dataset.

| Feature (OS prediction)              | C-index  | Feature (PFS prediction)             | C-index  |
|--------------------------------------|----------|--------------------------------------|----------|
| Subgroup_Clinical                    | 0.662307 | Subgroup_Clinical                    | 0.668176 |
| CA19_Clinical                        | 0.597479 | CA19_Clinical                        | 0.536108 |
| R_Margins_Clinical                   | 0.628413 | R_Margins_Clinical                   | 0.630722 |
| Grading_Clinical                     | 0.496086 | Localization_Clinical                | 0.612607 |
| Age_Clinical                         | 0.503342 | Age_Clinical                         | 0.528519 |
| original_firstorder_90Percentile_GTV | 0.626122 | Alcohol_quant_Clinical               | 0.579315 |
| original_glcm_ClusterShade_RPV       | 0.479282 | Gender_Clinical                      | 0.497062 |
| original_firstorder_Skewness_RPV     | 0.555566 | Tobacco_quant_Clinical               | 0.482864 |
| original_shape_Sphericity_RPV        | 0.516231 | Grading_Clinical                     | 0.639657 |
| original_glcm_InverseVariance_RPV    | 0.499427 | original_glcm_Contrast_GTV           | 0.508201 |
| original_shape_Flatness_RPV          | 0.514989 | original_glcm_Contrast_RPV           | 0.498898 |
| original_glcm_Contrast_RPV           | 0.491598 | original_glcm_Correlation_RPV        | 0.533782 |
| original_shape_LeastAxisLength_RPV   | 0.509547 | original_firstorder_90Percentile_GTV | 0.562668 |
| original_shape_MeshVolume_GTV        | 0.582490 | original_glcm_Correlation_GTV        | 0.573072 |
| original_shape_MeshVolume_RPV        | 0.438037 | original_glcm_Idn_GTV                | 0.564015 |
|                                      |          | original_shape_MeshVolume_GTV        | 0.511506 |
|                                      |          | original_shape_MeshVolume_RPV        | 0.538066 |

Table S4: Univariate analysis for clinical and radiomic features.

## C-Indexes across different types of treatment

The following table S5 presents the results for the c-index in predicting OS and PFS using top-performing models for various patient subgroups with different types of treatment. In particular, a fairness analysis was applied. To obtain reliable results, the analysis was conducted only on subgroups with more than 30 patients and a censored patient count below 80%[3]. The analysis utilised 10-fold cross-validation on the entire dataset.

|                | Type of treatment          | Number of patients | Censored patients (Percentage) | C-index |
|----------------|----------------------------|--------------------|--------------------------------|---------|
| OS prediction  | FOLFIRINOX                 | 103                | 15%                            | 0.730   |
|                | Gemcitabine + Abraxane     | 133                | 12%                            | 0.701   |
|                | Cisplatin + 5-Fluorouracil | 8                  | 12%                            | -       |
|                | Gemcitabine + Cisplatin    | 5                  | 20%                            | -       |
|                | No treatment               | 38                 | 11%                            | 0.701   |
|                | All                        | 287                | 13%                            | 0.711   |
| PFS prediction | FOLFIRINOX                 | 103                | 17%                            | 0.694   |
|                | Gemcitabine + Abraxane     | 133                | 20%                            | 0.680   |
|                | Cisplatin + 5-Fluorouracil | 8                  | 38%                            | -       |
|                | Gemcitabine + Cisplatin    | 5                  | 0%                             | -       |
|                | No treatment               | 38                 | 82%                            | -       |
|                | All                        | 287                | 27%                            | 0.677   |

Table S5: C-indexes in predicting OS and PFS for various patient subgroups with different types of treatment.

### Intercorrelation between chosen features and volumes.

|                                      | GTV1 volume | RPV volume |
|--------------------------------------|-------------|------------|
| Subgroup_Clinical                    | 0.39        | 0.13       |
| CA19_Clinical                        | 0.24        | -0.11      |
| R_Margins_Clinical                   | 0.40        | 0.04       |
| Grading_Clinical                     | 0.01        | 0.07       |
| Age_Clinical                         | -0.10       | -0.20      |
| original_firstorder_90Percentile_GTV | -0.22       | -0.09      |
| original_glcm_ClusterShade_RPV       | 0.08        | 0.08       |
| original_firstorder_Skewness_RPV     | 0.16        | -0.20      |
| original_shape_Sphericity_RPV        | -0.69       | 0.03       |
| original_glcm_InverseVariance_RPV    | -0.04       | -0.13      |
| original_shape_Flatness_RPV          | 0.49        | 0.03       |
| original_glcm_Contrast_RPV           | -0.13       | -0.20      |
| original_shape_LeastAxisLength_RPV   | 0.55        | 0.67       |
| Localization_Clinical                | 0.41        | 0.02       |
| Alcohol_quant_Clinical               | -0.09       | -0.00      |
| Gender_Clinical                      | 0.08        | 0.20       |
| Tobacco_quant_Clinical               | -0.05       | 0.19       |
| original_glcm_Contrast_GTV           | -0.08       | -0.04      |



|                               |      |       |
|-------------------------------|------|-------|
| original_glcm_Correlation_RPV | 0.13 | -0.10 |
| original_glcm_Correlation_GTV | 0.31 | -0.16 |
| original_glcm_Idn_GTV         | 0.60 | -0.09 |
| GTV1 volume                   | 1.00 | 0.18  |
| RPV volume                    | 0.18 | 1.00  |

Table S6: The intercorrelation between the chosen features and volumes in the testing dataset (missing clinical features were filled using the MissForest package; the values were not standardised). The volumes for GTV1 and RPV are calculated using the triangle mesh method [4,5]. The Spearman correlation coefficient was utilised to calculate the inter-correlation among the selected features and volumes.

### Radiomics quality score

The radiomics workflow was assessed using the Radiomics Quality Score (RQS) [6,7]. The RQS score obtained for this study was 17/36. The RQS is determined by a 36-point system. A higher score indicates a greater level of methodological quality in reporting and research[7].

### References

1. Zins, M.; Matos, C.; Cassinotto, C. Pancreatic Adenocarcinoma Staging in the Era of Preoperative Chemotherapy and Radiation Therapy. *Radiology* **2018**, *287*, 374–390.
2. Tempero, M.A.; Malafa, M.P.; Al-Hawary, M.; Behrman, S.W.; Benson, A.B.; Cardin, D.B.; Chiorean, E.G.; Chung, V.; Czito, B.; Del Chiaro, M.; et al. Pancreatic Adenocarcinoma, Version 2.2021, NCCN Clinical Practice Guidelines in Oncology. *J. Natl. Compr. Canc. Netw.* **2021**, *19*, 439–457.
3. Zhu, X.; Zhou, X.; Zhang, Y.; Sun, X.; Liu, H.; Zhang, Y. Reporting and Methodological Quality of Survival Analysis in Articles Published in Chinese Oncology Journals. *Medicine* **2017**, *96*, e9204.
4. Lorensen, W.E.; Cline, H.E. Marching Cubes: A High Resolution 3D Surface Construction Algorithm. *Comput. Graph.* **1987**, *21*, 163–169.
5. van Griethuysen, J.J.M.; Fedorov, A.; Parmar, C.; Hosny, A.; Aucoin, N.; Narayan, V.; Beets-Tan, R.G.H.; Fillion-Robin, J.-C.; Pieper, S.; Aerts, H.J.W.L. Computational Radiomics System to Decode the Radiographic Phenotype. *Cancer Res.* **2017**, *77*, e104–e107.
6. Lambin, P.; Leijenaar, R.T.H.; Deist, T.M.; Peerlings, J.; de Jong, E.E.C.; van Timmeren, J.; Sanduleanu, S.; Larue, R.T.H.M.; Even, A.J.G.; Jochems, A.; et al. Radiomics: The Bridge between Medical Imaging and Personalized Medicine. *Nat. Rev. Clin. Oncol.* **2017**, *14*, 749–762.
7. Sanduleanu, S.; Woodruff, H.C.; de Jong, E.E.C.; van Timmeren, J.E.; Jochems, A.; Dubois, L.; Lambin, P. Tracking Tumor Biology with Radiomics: A Systematic Review Utilizing a Radiomics Quality Score. *Radiother. Oncol.* **2018**, *127*, 349–360.
