# Supplementary material for: Development of Clinical Radiomics-Based Models to Predict Survival Outcome in Pancreatic Ductal Adenocarcinoma: A Multicenter Retrospective Study
Source: Diagnostics (Basel). 2024 Mar 28;14(7):712. doi: 10.3390/diagnostics14070712 (PMC11011556; doi:10.3390/diagnostics14070712)
Supplement: Supplementary file 1 [file diagnostics-14-00712-s001.zip › Diagnostics - Supplementary Table S7.xlsx]

## Sheet: CT data - Table S7
ID	Dataset	Manufacturer	Manufacturer Model Name	Manufacturer Model Code	Slice Thickness	Pixel Spacing	KVP
1	Training group (dataset 1 & 2)	SIEMENS	Sensation 64	1	1.5	0.835938	120
2	Training group (dataset 1 & 2)	SIEMENS	Sensation 64	1	1.5	0.785156	120
3	Training group (dataset 1 & 2)	SIEMENS	Sensation 64	1	1.5	0.939453	120
4	Training group (dataset 1 & 2)	SIEMENS	SOMATOM Force	2	1.5	0.738281	90
5	Training group (dataset 1 & 2)	SIEMENS	SOMATOM Force	2	1	0.673828	90
6	Training group (dataset 1 & 2)	SIEMENS	SOMATOM Force	2	1	0.658203	100
7	Training group (dataset 1 & 2)	SIEMENS	Sensation 64	1	1.5	0.720703	120
8	Training group (dataset 1 & 2)	SIEMENS	Sensation 64	1	1.5	0.826172	120
9	Training group (dataset 1 & 2)	SIEMENS	SOMATOM Force	2	1	0.623047	90
10	Training group (dataset 1 & 2)	SIEMENS	SOMATOM Force	2	1	0.632812	100
11	Training group (dataset 1 & 2)	SIEMENS	SOMATOM Force	2	1	0.837891	100
12	Training group (dataset 1 & 2)	SIEMENS	SOMATOM Force	2	1	0.634766	90
13	Training group (dataset 1 & 2)	SIEMENS	Sensation 64	1	1.5	0.683594	120
14	Training group (dataset 1 & 2)	SIEMENS	SOMATOM Force	2	1	0.746094	90
15	Training group (dataset 1 & 2)	SIEMENS	SOMATOM Force	2	1	0.716797	100
16	Training group (dataset 1 & 2)	SIEMENS	Sensation 64	1	1.5	0.75	120
17	Training group (dataset 1 & 2)	SIEMENS	SOMATOM Definition AS	3	1.5	0.601562	100
18	Training group (dataset 1 & 2)	SIEMENS	SOMATOM Definition AS	3	1.5	0.816406	120
19	Training group (dataset 1 & 2)	SIEMENS	SOMATOM Definition AS	3	1.5	0.732422	100
20	Training group (dataset 1 & 2)	SIEMENS	Sensation 64	1	1.5	0.666016	120
21	Training group (dataset 1 & 2)	SIEMENS	SOMATOM Definition AS	3	1.5	0.761719	100
22	Training group (dataset 1 & 2)	SIEMENS	SOMATOM Force	2	1	0.652344	100
23	Training group (dataset 1 & 2)	SIEMENS	SOMATOM Force	2	1.5	0.841797	90
24	Training group (dataset 1 & 2)	SIEMENS	SOMATOM Force	2	5	0.679688	90
25	Training group (dataset 1 & 2)	SIEMENS	Sensation 64	1	5	0.726562	120
26	Training group (dataset 1 & 2)	SIEMENS	SOMATOM Definition AS	3	1.5	0.730469	100
27	Training group (dataset 1 & 2)	SIEMENS	SOMATOM Definition AS	3	1.5	0.623047	120
28	Training group (dataset 1 & 2)	SIEMENS	Sensation 64	1	5	0.798828	120
29	Training group (dataset 1 & 2)	SIEMENS	SOMATOM Force	2	1.5	0.824219	90
30	Training group (dataset 1 & 2)	SIEMENS	SOMATOM Force	2	1	0.732422	110
31	Training group (dataset 1 & 2)	SIEMENS	SOMATOM Force	2	1	0.683594	100
32	Training group (dataset 1 & 2)	SIEMENS	Sensation 64	1	1.5	0.818359	120
33	Training group (dataset 1 & 2)	SIEMENS	Sensation 64	1	1.5	0.802734	120
34	Training group (dataset 1 & 2)	SIEMENS	Sensation 64	1	1.5	0.896484	120
35	Training group (dataset 1 & 2)	SIEMENS	SOMATOM Force	2	1.5	0.802734	90
36	Training group (dataset 1 & 2)	SIEMENS	SOMATOM Force	2	1.5	0.820312	90
37	Training group (dataset 1 & 2)	SIEMENS	SOMATOM Force	2	1.5	0.757812	90
38	Training group (dataset 1 & 2)	SIEMENS	SOMATOM Force	2	1	0.660156	100
39	Training group (dataset 1 & 2)	SIEMENS	Sensation 64	1	1.5	0.683594	120
40	Training group (dataset 1 & 2)	SIEMENS	SOMATOM Force	2	1.5	0.695312	90
41	Training group (dataset 1 & 2)	SIEMENS	SOMATOM Force	2	1	0.722656	100
42	Training group (dataset 1 & 2)	SIEMENS	Sensation 64	1	1.5	0.697266	120
43	Training group (dataset 1 & 2)	SIEMENS	SOMATOM Force	2	1	0.726562	90
44	Training group (dataset 1 & 2)	SIEMENS	Sensation 64	1	1.5	0.683594	120
45	Training group (dataset 1 & 2)	SIEMENS	Sensation 64	1	1.5	0.75	120
46	Training group (dataset 1 & 2)	SIEMENS	SOMATOM Definition AS	3	5	0.826172	100
47	Training group (dataset 1 & 2)	SIEMENS	Sensation 64	1	1.5	0.8125	120
48	Training group (dataset 1 & 2)	SIEMENS	Definition AS	4	1.5	0.691406	120
49	Training group (dataset 1 & 2)	SIEMENS	Sensation 64	1	1.5	0.720703	120
50	Training group (dataset 1 & 2)	SIEMENS	SOMATOM Force	2	1	0.691406	100
51	Training group (dataset 1 & 2)	SIEMENS	SOMATOM Force	2	1.5	0.693359	90
52	Training group (dataset 1 & 2)	SIEMENS	Sensation 64	1	1.5	0.658203	120
53	Training group (dataset 1 & 2)	SIEMENS	SOMATOM Force	2	1.5	0.777344	90
54	Training group (dataset 1 & 2)	SIEMENS	SOMATOM Force	2	1	0.703125	90
55	Training group (dataset 1 & 2)	SIEMENS	SOMATOM Force	2	1.5	0.671875	90
56	Training group (dataset 1 & 2)	SIEMENS	SOMATOM Definition AS	3	1.5	0.65625	100
57	Training group (dataset 1 & 2)	SIEMENS	SOMATOM Force	2	1	0.615234	100
58	Training group (dataset 1 & 2)	SIEMENS	SOMATOM Force	2	1	0.667969	100
59	Training group (dataset 1 & 2)	SIEMENS	SOMATOM Force	2	1.5	0.708984	90
60	Training group (dataset 1 & 2)	SIEMENS	Sensation 64	1	1.5	0.660156	120
61	Training group (dataset 1 & 2)	SIEMENS	SOMATOM Definition AS	3	1.5	0.806641	120
62	Training group (dataset 1 & 2)	SIEMENS	SOMATOM Force	2	1	0.75	100
63	Training group (dataset 1 & 2)	SIEMENS	SOMATOM Force	2	1	0.582031	90
64	Training group (dataset 1 & 2)	SIEMENS	Sensation 64	1	1.5	0.648438	120
65	Training group (dataset 1 & 2)	SIEMENS	Sensation 64	1	1.5	0.75	120
66	Training group (dataset 1 & 2)	SIEMENS	Sensation 64	1	1.5	0.726562	120
67	Training group (dataset 1 & 2)	SIEMENS	SOMATOM Force	2	1.5	0.822266	90
68	Training group (dataset 1 & 2)	SIEMENS	SOMATOM Force	2	1	0.609375	100
69	Training group (dataset 1 & 2)	SIEMENS	Sensation 64	1	1.5	0.828125	120
70	Training group (dataset 1 & 2)	SIEMENS	SOMATOM Force	2	1	0.669922	90
71	Training group (dataset 1 & 2)	SIEMENS	SOMATOM Force	2	1	0.697266	90
72	Training group (dataset 1 & 2)	SIEMENS	SOMATOM Definition AS	3	1.5	0.695312	100
73	Training group (dataset 1 & 2)	SIEMENS	SOMATOM Force	2	1	0.78125	90
74	Training group (dataset 1 & 2)	SIEMENS	Sensation 64	1	1.5	0.611328	120
75	Training group (dataset 1 & 2)	SIEMENS	Sensation 64	1	1.5	0.650391	120
76	Training group (dataset 1 & 2)	SIEMENS	Sensation 64	1	1.5	0.818359	120
77	Training group (dataset 1 & 2)	SIEMENS	SOMATOM Force	2	1	0.832031	110
78	Training group (dataset 1 & 2)	SIEMENS	Sensation 64	1	1.5	0.6875	120
79	Training group (dataset 1 & 2)	SIEMENS	Sensation 64	1	1.5	0.75	120
80	Training group (dataset 1 & 2)	SIEMENS	Sensation 64	1	1.5	0.75	120
81	Training group (dataset 1 & 2)	SIEMENS	SOMATOM Force	2	1.5	0.699219	90
82	Training group (dataset 1 & 2)	SIEMENS	SOMATOM Definition AS	3	1.5	0.662109	100
83	Training group (dataset 1 & 2)	SIEMENS	Sensation 64	1	1.5	0.779297	120
84	Training group (dataset 1 & 2)	SIEMENS	Sensation 16	5	2	0.681641	120
85	Training group (dataset 1 & 2)	SIEMENS	Sensation 64	1	1.5	0.621094	120
86	Training group (dataset 1 & 2)	SIEMENS	SOMATOM Force	2	1	0.716797	100
87	Training group (dataset 1 & 2)	SIEMENS	Sensation 16	5	2	0.685547	120
88	Training group (dataset 1 & 2)	SIEMENS	SOMATOM Force	2	1	0.654297	100
89	Training group (dataset 1 & 2)	SIEMENS	Sensation 64	1	1.5	0.679688	120
90	Training group (dataset 1 & 2)	SIEMENS	Sensation 64	1	1.5	0.675781	120
91	Training group (dataset 1 & 2)	SIEMENS	Sensation 64	1	1.5	0.6875	120
92	Training group (dataset 1 & 2)	SIEMENS	Sensation 64	1	1.5	0.699219	120
93	Training group (dataset 1 & 2)	SIEMENS	Sensation 64	1	1.5	0.837891	120
94	Training group (dataset 1 & 2)	SIEMENS	Sensation 64	1	1.5	0.908203	120
95	Training group (dataset 1 & 2)	SIEMENS	Emotion 16	6	1.5	0.724609	130
96	Training group (dataset 1 & 2)	SIEMENS	Sensation 64	1	1.5	0.701172	120
97	Training group (dataset 1 & 2)	SIEMENS	SOMATOM Force	2	1	0.693359	100
98	Training group (dataset 1 & 2)	SIEMENS	Sensation 64	1	1.5	0.798828	120
99	Training group (dataset 1 & 2)	SIEMENS	Sensation 64	1	1.5	0.628906	120
100	Training group (dataset 1 & 2)	SIEMENS	SOMATOM Force	2	1.5	0.628906	100
101	Training group (dataset 1 & 2)	SIEMENS	Sensation 16	5	2	0.693359	120
102	Training group (dataset 1 & 2)	SIEMENS	Sensation 64	1	1.5	0.722656	120
103	Training group (dataset 1 & 2)	SIEMENS	Sensation 64	1	1.5	0.808594	120
104	Training group (dataset 1 & 2)	SIEMENS	Sensation 64	1	1.5	0.632812	120
105	Training group (dataset 1 & 2)	SIEMENS	Sensation 64	1	1.5	0.755859	120
106	Training group (dataset 1 & 2)	SIEMENS	Sensation 64	1	1.5	0.683594	120
107	Training group (dataset 1 & 2)	SIEMENS	Sensation 64	1	1.5	0.613281	120
108	Training group (dataset 1 & 2)	SIEMENS	Sensation 64	1	1.5	0.683594	120
109	Training group (dataset 1 & 2)	SIEMENS	Sensation 64	1	1.5	0.541016	120
110	Training group (dataset 1 & 2)	SIEMENS	SOMATOM Force	2	1	0.617188	100
111	Training group (dataset 1 & 2)	SIEMENS	Sensation 64	1	1.5	0.724609	120
112	Training group (dataset 1 & 2)	SIEMENS	Sensation 64	1	1.5	0.683594	120
113	Training group (dataset 1 & 2)	SIEMENS	Sensation 64	1	1.5	0.753906	120
114	Training group (dataset 1 & 2)	SIEMENS	Sensation 16	5	2	0.660156	120
115	Training group (dataset 1 & 2)	SIEMENS	Sensation 64	1	1.5	0.728516	120
116	Training group (dataset 1 & 2)	SIEMENS	SOMATOM Force	2	1	0.646484	100
117	Training group (dataset 1 & 2)	SIEMENS	Sensation 64	1	1.5	0.697266	120
118	Training group (dataset 1 & 2)	SIEMENS	Sensation 16	5	2	0.613281	120
119	Training group (dataset 1 & 2)	SIEMENS	Sensation 16	5	2	0.773438	120
120	Training group (dataset 1 & 2)	SIEMENS	Sensation 64	1	1.5	0.748047	120
121	Training group (dataset 1 & 2)	SIEMENS	Sensation 64	1	1.5	0.761719	120
122	Training group (dataset 1 & 2)	SIEMENS	Sensation 64	1	1.5	0.785156	120
123	Training group (dataset 1 & 2)	SIEMENS	Definition AS	4	1.5	0.742188	120
124	Training group (dataset 1 & 2)	SIEMENS	Sensation 16	5	2	0.683594	120
125	Training group (dataset 1 & 2)	SIEMENS	Sensation 64	1	1.5	0.746094	120
126	Training group (dataset 1 & 2)	SIEMENS	Sensation 16	5	2	0.873047	120
127	Training group (dataset 1 & 2)	SIEMENS	Sensation 16	5	2	0.683594	120
128	Training group (dataset 1 & 2)	SIEMENS	Emotion 16	6	1.5	0.708984	130
129	Training group (dataset 1 & 2)	SIEMENS	Sensation 64	1	1.5	0.742188	120
130	Training group (dataset 1 & 2)	SIEMENS	Sensation 64	1	1.5	0.828125	120
131	Training group (dataset 1 & 2)	SIEMENS	Sensation 16	5	2	0.683594	120
132	Training group (dataset 1 & 2)	SIEMENS	Sensation 64	1	1.5	0.736328	120
133	Training group (dataset 1 & 2)	SIEMENS	Sensation 64	1	1.5	0.744141	120
134	Training group (dataset 1 & 2)	SIEMENS	Sensation 16	5	2	0.976562	120
135	Training group (dataset 1 & 2)	SIEMENS	SOMATOM Force	2	1	0.574219	100
136	Training group (dataset 1 & 2)	SIEMENS	Sensation 16	5	2	0.652344	120
137	Training group (dataset 1 & 2)	SIEMENS	SOMATOM Force	2	1	0.771484	110
138	Training group (dataset 1 & 2)	SIEMENS	Sensation 16	5	2	0.773438	120
139	Training group (dataset 1 & 2)	SIEMENS	Sensation 16	5	2	0.683594	120
140	Training group (dataset 1 & 2)	SIEMENS	Sensation 64	1	1.5	0.646484	120
141	Training group (dataset 1 & 2)	SIEMENS	SOMATOM Force	2	1	0.648438	100
142	Training group (dataset 1 & 2)	SIEMENS	Sensation 16	5	2	0.740234	120
143	Training group (dataset 1 & 2)	SIEMENS	Sensation 64	1	1.5	0.720703	120
144	Training group (dataset 1 & 2)	SIEMENS	Sensation 64	1	1.5	0.726562	120
145	Training group (dataset 1 & 2)	SIEMENS	Sensation 64	1	1.5	0.695312	120
146	Training group (dataset 1 & 2)	SIEMENS	Definition AS	4	1.5	0.556641	120
147	Training group (dataset 1 & 2)	SIEMENS	Sensation 64	1	1.5	0.640625	120
148	Training group (dataset 1 & 2)	SIEMENS	SOMATOM Force	2	1.5	0.820312	90
149	Training group (dataset 1 & 2)	SIEMENS	Sensation 64	1	1.5	0.652344	120
150	Training group (dataset 1 & 2)	SIEMENS	Sensation 16	5	2	0.773438	120
151	Training group (dataset 1 & 2)	SIEMENS	Sensation 64	1	1.5	0.771484	120
152	Training group (dataset 1 & 2)	SIEMENS	SOMATOM Force	2	1	0.654297	100
153	Training group (dataset 1 & 2)	SIEMENS	Sensation 64	1	1.5	0.763672	120
154	Training group (dataset 1 & 2)	SIEMENS	SOMATOM Force	2	1	0.769531	90
155	Training group (dataset 1 & 2)	SIEMENS	Sensation 64	1	1.5	0.582031	120
156	Training group (dataset 1 & 2)	SIEMENS	Sensation 64	1	1.5	0.693359	120
157	Training group (dataset 1 & 2)	SIEMENS	Sensation 16	5	2	0.773438	120
158	Training group (dataset 1 & 2)	SIEMENS	Sensation 16	5	2	0.667969	120
159	Training group (dataset 1 & 2)	SIEMENS	Sensation 64	1	1.5	0.779297	120
160	Training group (dataset 1 & 2)	SIEMENS	Sensation 64	1	1.5	0.669922	120
161	Training group (dataset 1 & 2)	SIEMENS	SOMATOM Force	2	1	0.691406	110
162	Training group (dataset 1 & 2)	SIEMENS	SOMATOM Definition AS+	7	2	0.683594	100
163	Training group (dataset 1 & 2)	SIEMENS	SOMATOM Definition AS	3	1.5	0.720703	100
164	Training group (dataset 1 & 2)	SIEMENS	SOMATOM Force	2	1	0.777344	90
165	Training group (dataset 1 & 2)	SIEMENS	SOMATOM Force	2	1	0.683594	90
166	Training group (dataset 1 & 2)	SIEMENS	SOMATOM Definition Flash	8	3	0.65625	100
167	Training group (dataset 1 & 2)	SIEMENS	Sensation 64	1	1.5	0.75	120
168	Training group (dataset 1 & 2)	SIEMENS	SOMATOM Definition AS	3	1.5	0.755859	100
169	Training group (dataset 1 & 2)	SIEMENS	Sensation 64	1	1.5	0.75	120
170	Training group (dataset 1 & 2)	SIEMENS	Sensation 64	1	1.5	0.806641	120
171	Training group (dataset 1 & 2)	SIEMENS	SOMATOM Force	2	1.5	0.845703	90
172	Training group (dataset 1 & 2)	SIEMENS	Sensation 64	1	1.5	0.75	120
173	Training group (dataset 1 & 2)	SIEMENS	SOMATOM Force	2	1	0.736328	90
174	Testing group (dataset 3)	SIEMENS	SOMATOM Definition AS	3	120	3	0.669922
175	Testing group (dataset 3)	TOSHIBA	Aquilion	9	120	3	0.592
176	Testing group (dataset 3)	SIEMENS	Emotion 16	6	130	3	0.761719
177	Testing group (dataset 3)	SIEMENS	SOMATOM Definition Flash	8	100	5	0.789062
178	Testing group (dataset 3)	Philips	IQon - Spectral CT	10	120	1	0.644531
179	Testing group (dataset 3)	SIEMENS	Emotion 16	6	130	5	0.634766
180	Testing group (dataset 3)	SIEMENS	Definition AS	4	120	5	0.871094
181	Testing group (dataset 3)	SIEMENS	SOMATOM Definition AS	3	100	3	0.867188
182	Testing group (dataset 3)	SIEMENS	SOMATOM Definition AS	3	100	3	0.830078
183	Testing group (dataset 3)	SIEMENS	SOMATOM Definition AS+	7	120	3	0.875
184	Testing group (dataset 3)	SIEMENS	Emotion 16	6	130	5	0.708984
185	Testing group (dataset 3)	TOSHIBA	Aquilion	9	120	1	0.77
186	Testing group (dataset 3)	SIEMENS	SOMATOM Definition AS	3	120	5	0.728516
187	Testing group (dataset 3)	SIEMENS	Sensation 64	1	120	5	0.751953
188	Testing group (dataset 3)	SIEMENS	SOMATOM Definition AS+	7	120	1	0.765625
189	Testing group (dataset 3)	SIEMENS	Sensation 16	5	120	2	0.648438
190	Testing group (dataset 3)	SIEMENS	SOMATOM Definition AS	3	120	3	0.761719
191	Testing group (dataset 3)	SIEMENS	SOMATOM Force	2	100	3	0.625
192	Testing group (dataset 3)	SIEMENS	SOMATOM Definition AS+	7	100	2	0.951172
193	Testing group (dataset 3)	SIEMENS	SOMATOM Definition Flash	8	100	1.5	0.707031
194	Testing group (dataset 3)	SIEMENS	Emotion 6	11	130	5	0.6875
195	Testing group (dataset 3)	SIEMENS	SOMATOM Definition AS+	7	100	3	0.75
196	Testing group (dataset 3)	SIEMENS	Emotion 16 (2007)	12	130	1.5	0.804688
197	Testing group (dataset 3)	SIEMENS	Sensation 64	1	120	5	0.765625
198	Testing group (dataset 3)	GE MEDICAL SYSTEMS	LightSpeed VCT	13	120	5	0.728516
199	Testing group (dataset 3)	SIEMENS	Emotion 16 (2007)	12	130	3	0.880859
200	Testing group (dataset 3)	SIEMENS	SOMATOM Drive	14	80	3	0.785156
201	Testing group (dataset 3)	SIEMENS	SOMATOM Definition AS	3	100	3	0.693359
202	Testing group (dataset 3)	TOSHIBA	Aquilion ONE	15	120	5	0.763
203	Testing group (dataset 3)	SIEMENS	Sensation 64	1	120	3	0.697266
204	Testing group (dataset 3)	SIEMENS	SOMATOM Definition Flash	8	100	3	0.857422
205	Testing group (dataset 3)	TOSHIBA	Aquilion	9	120	3	0.778
206	Testing group (dataset 3)	SIEMENS	SOMATOM Definition Flash	8	100	3	0.792969
207	Testing group (dataset 3)	TOSHIBA	Aquilion	9	120	3	0.946
208	Testing group (dataset 3)	SIEMENS	SOMATOM Definition Flash	8	100	3	0.701172
209	Testing group (dataset 3)	SIEMENS	Emotion 16	6	130	5	0.808594
210	Testing group (dataset 3)	GE MEDICAL SYSTEMS	Optima CT540	16	120	1.25	0.859375
211	Testing group (dataset 3)	TOSHIBA	Aquilion	9	100	1	0.801
212	Testing group (dataset 3)	SIEMENS	Emotion 16 (2007)	12	130	3	0.746094
213	Testing group (dataset 3)	SIEMENS	SOMATOM Definition AS+	7	120	1.5	0.689453
214	Testing group (dataset 3)	SIEMENS	SOMATOM Definition AS	3	100	3	0.689453
215	Testing group (dataset 3)	TOSHIBA	Aquilion	9	120	3	0.57
216	Testing group (dataset 3)	SIEMENS	SOMATOM Force	2	100	1	0.791016
217	Testing group (dataset 3)	SIEMENS	SOMATOM Definition AS+	7	100	3	0.734375
218	Testing group (dataset 3)	SIEMENS	Definition	17	120	3	0.744141
219	Testing group (dataset 3)	SIEMENS	SOMATOM Force	2	90	2	0.773438
220	Testing group (dataset 3)	SIEMENS	Sensation 16	5	120	5	0.6875
221	Testing group (dataset 3)	GE MEDICAL SYSTEMS	BrightSpeed	18	120	5	0.703125
222	Testing group (dataset 3)	Philips	Brilliance 40	19	120	1	0.746094
223	Testing group (dataset 3)	SIEMENS	SOMATOM Definition AS	3	100	3	0.677734
224	Testing group (dataset 3)	GE MEDICAL SYSTEMS	Revolution EVO	20	120	1.25	0.78125
225	Testing group (dataset 3)	SIEMENS	SOMATOM Definition AS	3	120	5	0.734375
226	Testing group (dataset 3)	SIEMENS	SOMATOM Definition AS	3	120	3	0.927734
227	Testing group (dataset 3)	SIEMENS	SOMATOM Definition AS	3	100	3	0.830078
228	Testing group (dataset 3)	SIEMENS	SOMATOM Force	2	100	1	0.634766
229	Testing group (dataset 3)	TOSHIBA	Aquilion	9	120	5	0.675
230	Testing group (dataset 3)	GE MEDICAL SYSTEMS	LightSpeed VCT	13	120	2.5	0.882812
231	Testing group (dataset 3)	Philips	Brilliance 40	19	120	3	0.78125
232	Testing group (dataset 3)	SIEMENS	SOMATOM Definition AS+	7	120	3	0.9375
233	Testing group (dataset 3)	GE MEDICAL SYSTEMS	Revolution HD	21	120	5	0.966797
234	Testing group (dataset 3)	TOSHIBA	Aquilion	9	120	5	0.74
235	Testing group (dataset 3)	SIEMENS	SOMATOM Definition AS	3	120	1	0.679688
236	Testing group (dataset 3)	SIEMENS	SOMATOM Force	2	90	1	0.654297
237	Testing group (dataset 3)	SIEMENS	Emotion 6	11	130	2.5	0.660156
238	Testing group (dataset 3)	SIEMENS	SOMATOM Definition AS	3	120	3	0.935547
239	Testing group (dataset 3)	Philips	Mx8000 IDT 10	22	120	5	0.646484
240	Testing group (dataset 3)	SIEMENS	SOMATOM Force	2	90	3	0.628906
241	Testing group (dataset 3)	SIEMENS	Sensation 64	1	120	5	0.705078
242	Testing group (dataset 3)	TOSHIBA	Aquilion	9	120	3	0.961
243	Testing group (dataset 3)	SIEMENS	SOMATOM Definition AS	3	100	3	0.742188
244	Testing group (dataset 3)	SIEMENS	Definition	17	120	3	0.658203
245	Testing group (dataset 3)	TOSHIBA	Aquilion	9	120	3	0.679
246	Testing group (dataset 3)	SIEMENS	Sensation 64	1	120	5	0.677734
247	Testing group (dataset 3)	SIEMENS	Sensation 64	1	120	5	0.683594
248	Testing group (dataset 3)	TOSHIBA	Aquilion	9	120	5	0.747
249	Testing group (dataset 3)	TOSHIBA	Aquilion	9	120	5	0.782
250	Testing group (dataset 3)	SIEMENS	SOMATOM Definition AS	3	100	1	0.759766
251	Testing group (dataset 3)	SIEMENS	Emotion 16	6	130	5	0.708984
252	Testing group (dataset 3)	SIEMENS	SOMATOM Definition AS+	7	120	3	0.841797
253	Testing group (dataset 3)	SIEMENS	SOMATOM Definition AS	3	120	5	0.621094
254	Testing group (dataset 3)	TOSHIBA	Aquilion	9	120	3	0.774
255	Testing group (dataset 3)	SIEMENS	SOMATOM Definition AS	3	100	3	0.658203
256	Testing group (dataset 3)	SIEMENS	SOMATOM Definition AS	3	100	3	0.683594
257	Testing group (dataset 3)	TOSHIBA	Aquilion	9	120	3	0.75
258	Testing group (dataset 3)	SIEMENS	Emotion 6	11	130	5	0.671875
259	Testing group (dataset 3)	SIEMENS	Emotion 6	11	130	5	0.833984
260	Testing group (dataset 3)	SIEMENS	Definition AS+	23	100	3	0.871094
261	Testing group (dataset 3)	SIEMENS	SOMATOM Force	2	90	3	0.664062
262	Testing group (dataset 3)	SIEMENS	SOMATOM Definition AS	3	100	3	0.658203
263	Testing group (dataset 3)	TOSHIBA	Aquilion	9	120	3	0.881
264	Testing group (dataset 3)	GE MEDICAL SYSTEMS	LightSpeed VCT	13	140	3	0.703125
265	Testing group (dataset 3)	SIEMENS	SOMATOM Definition AS	3	100	3	0.691406
266	Testing group (dataset 3)	SIEMENS	SOMATOM Definition AS+	7	100	3	0.791016
267	Testing group (dataset 3)	SIEMENS	Emotion 16 (2007)	12	130	3	0.65625
268	Testing group (dataset 3)	SIEMENS	SOMATOM Definition AS	3	100	3	0.761719
269	Testing group (dataset 3)	SIEMENS	Emotion 16	6	130	5	0.775391
270	Testing group (dataset 3)	GE MEDICAL SYSTEMS	LightSpeed16	24	120	3	0.703125
271	Testing group (dataset 3)	SIEMENS	SOMATOM Definition AS+	7	100	1	0.810547
272	Testing group (dataset 3)	SIEMENS	SOMATOM Definition Flash	8	100	3	0.759766
273	Testing group (dataset 3)	TOSHIBA	Aquilion ONE	15	120	5	0.625
274	Testing group (dataset 3)	SIEMENS	SOMATOM Definition AS	3	100	5	0.771484
275	Testing group (dataset 3)	GE MEDICAL SYSTEMS	LightSpeed16	24	120	3	0.703125
276	Testing group (dataset 3)	SIEMENS	Emotion 6	11	130	3	0.701172
277	Testing group (dataset 3)	SIEMENS	SOMATOM Definition AS	3	100	3	0.701172
278	Testing group (dataset 3)	SIEMENS	SOMATOM Drive	14	100	3	0.746094
279	Testing group (dataset 3)	SIEMENS	SOMATOM Definition AS+	7	100	3	0.693359
280	Testing group (dataset 3)	SIEMENS	Sensation 64	1	120	1.5	0.841797
281	Testing group (dataset 3)	SIEMENS	SOMATOM Force	2	90	3	0.691406
282	Testing group (dataset 3)	SIEMENS	SOMATOM Drive	14	90	3	0.763672
283	Testing group (dataset 3)	SIEMENS	SOMATOM Definition AS	3	120	3	0.777344
284	Testing group (dataset 3)	SIEMENS	SOMATOM Definition AS+	7	100	3	0.777344
285	Testing group (dataset 3)	TOSHIBA	Aquilion	9	120	1	0.808
286	Testing group (dataset 3)	GE MEDICAL SYSTEMS	Revolution EVO	20	120	1.25	0.703125
287	Testing group (dataset 3)	SIEMENS	SOMATOM Definition AS	3	100	3	0.794922
